# Supplementary figures and images for: Adrenal gland as a sanctuary site for immunotherapy in patients with microsatellite instability-high metastatic colorectal cancer
Source: HighWire-hosted journal article supplement (doi:10.1136/jitc-2020-001903), 2021-02-01

**A**

**Non Repeat**

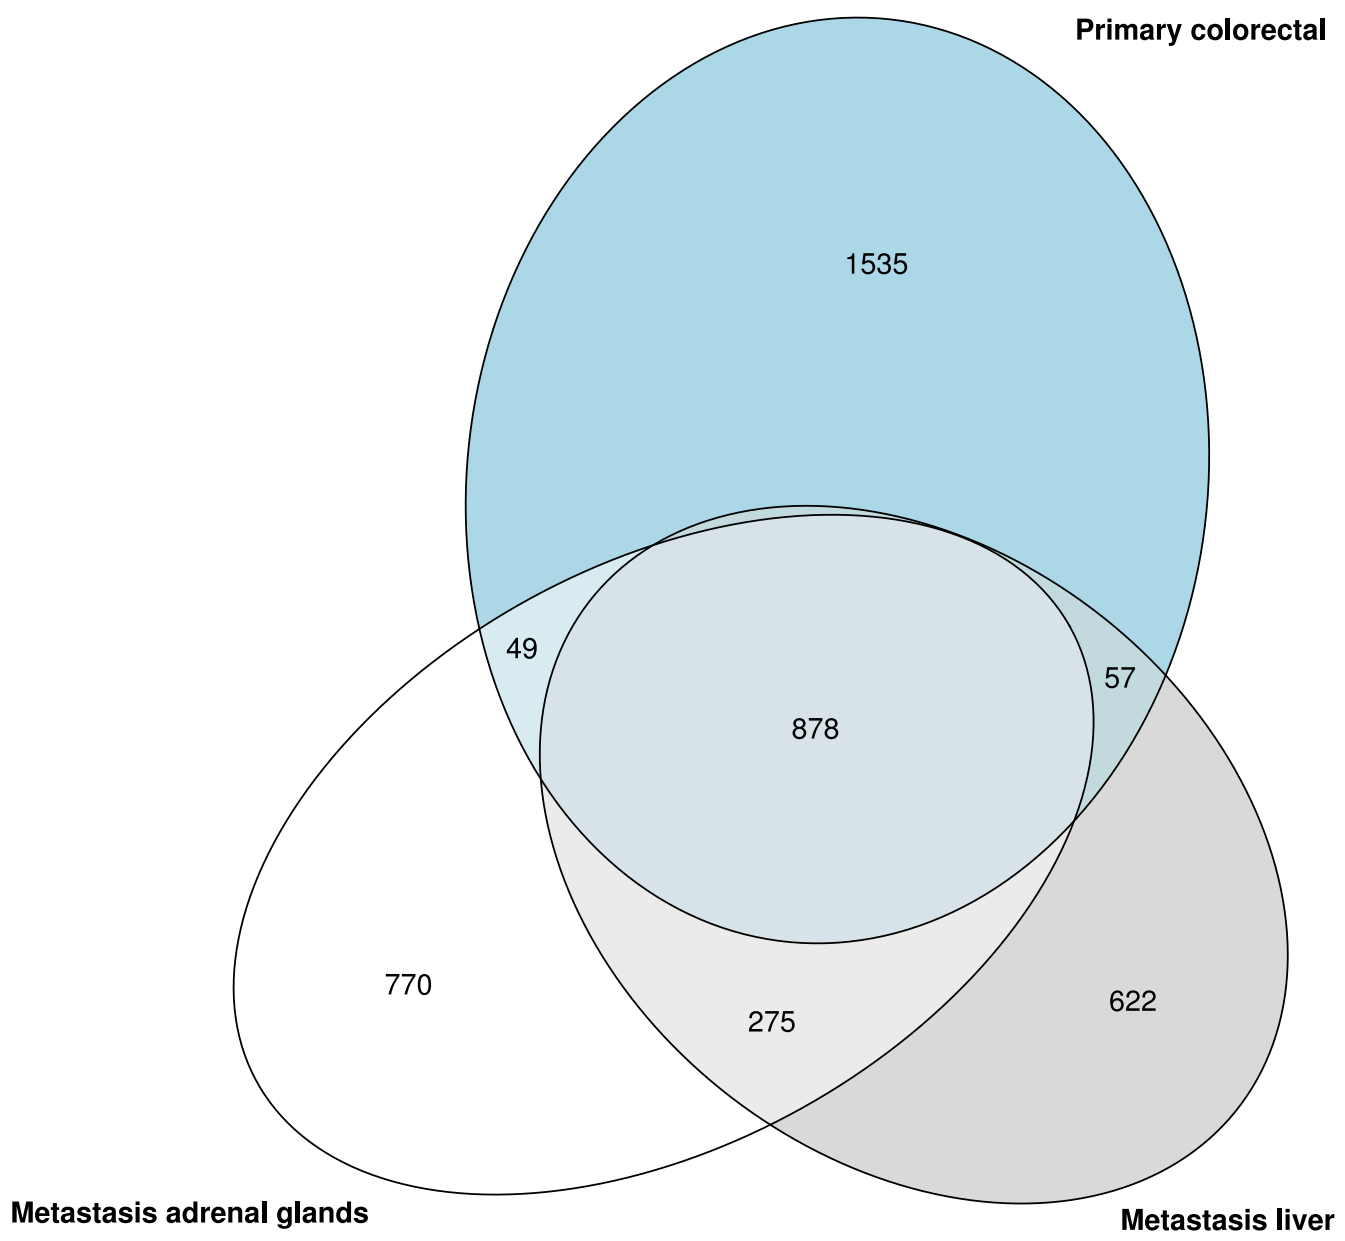

**B**

**Repeat**

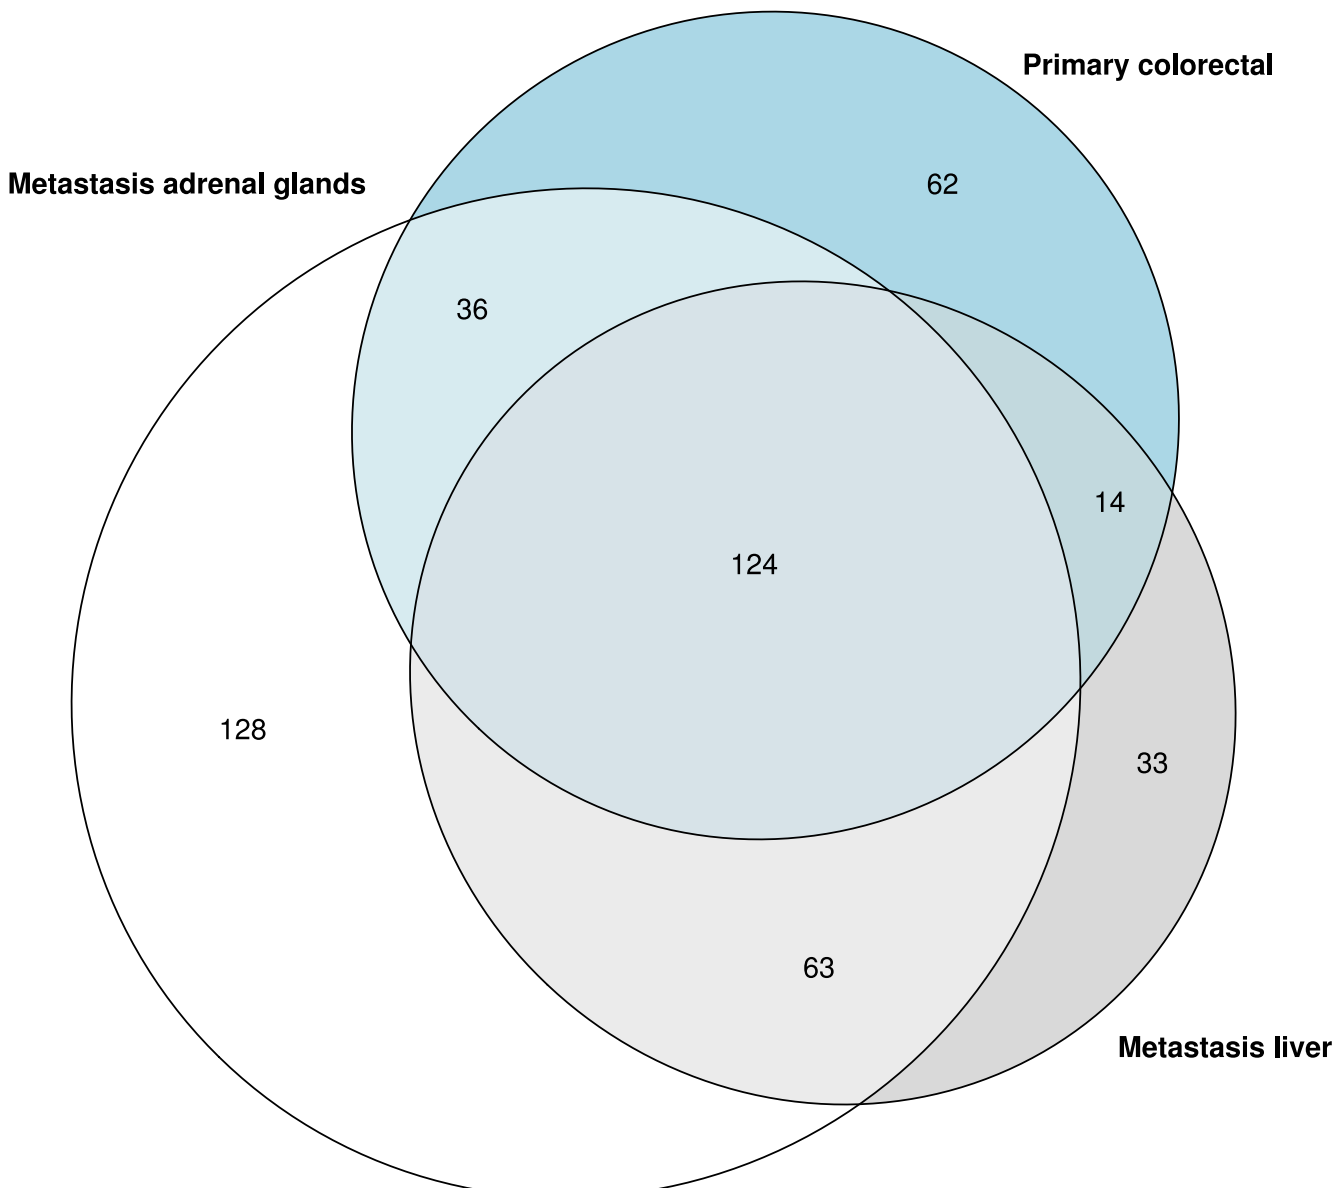

Supplement: jitc-2020-001903supp003_data_supplement.pdf [file jitc-2020-001903supp003_data_supplement.pdf]

# Ag presentation

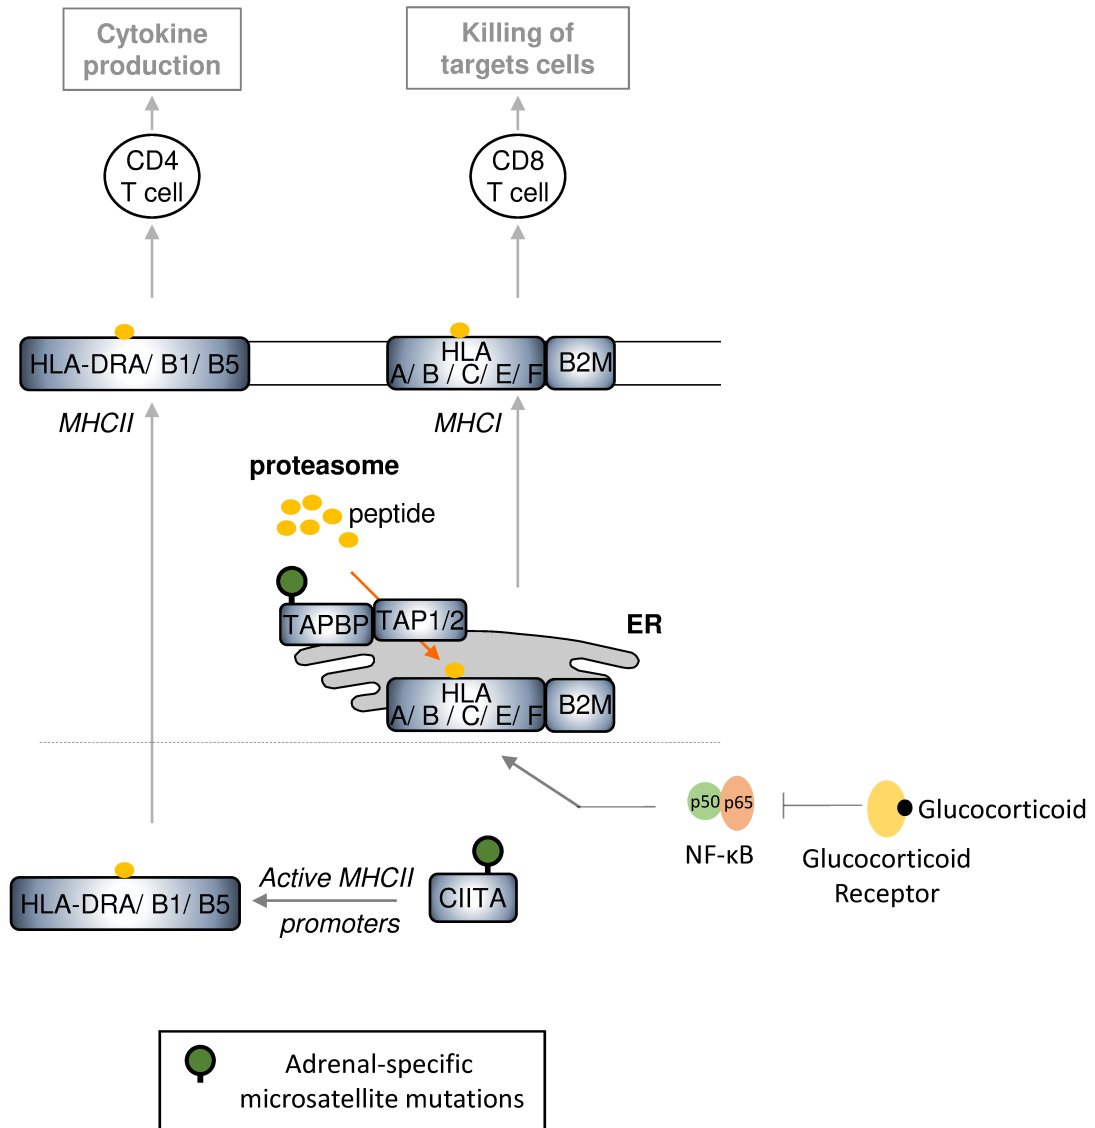

Supplement: jitc-2020-001903supp004_data_supplement.pdf [file jitc-2020-001903supp004_data_supplement.pdf]
